# Supplementary material
Source: PubMed Central journal article supplement (PMC10272273)
Supplement: 12325_2023_2516_MOESM1_ESM.pdf [file 12325_2023_2516_MOESM1_ESM.pdf]

**Real-world apremilast use for treatment of plaque psoriasis in Italy: patient perspective, characteristics, and clinical outcomes from the DARWIN study**

Claudia Giofrè<sup>1</sup>, Gabriella Fabbrocini<sup>2§</sup>, Concetta Potenza<sup>3</sup>, Rossana Tiberio<sup>4</sup>, Paolo Gisondi<sup>5</sup>, Claudio Marasca<sup>6</sup>, Carmen M. A. Nuzzo<sup>7</sup>, Emiliana Benincasa<sup>7</sup>, Luca Bianchi<sup>8</sup> on behalf of DARWIN study group

(1) UOC Dermatologia, Azienda Ospedaliera Papardo, Messina, Italy.

(2) UOC Dermatologia Clinica, AOU Federico II, Naples, Italy.

(3) Dermatologia Polo Pontina, Ospedale A. Fiorini, Terracina, Italy.

(4) *Former*: Dermatologia, AOU Maggiore della Carità, Novara, Italy – *Actual*: AUSL della Romagna, Rimini, Italy.

(5) UO Dermatologica, AOU Integrata di Verona, Verona, Italy.

(6) *Former*: UOC Dermatologia Clinica, AOU Federico II, Naples, Italy - *Actual*: Melanoma, Cancer Immunotherapy and Development Therapeutics Unit. Istituto Nazionale Tumori IRCCS Fondazione "G. Pascale", Naples, Italy.

(7) Amgen S.r.l. a socio unico, Milan, Italy.

(8) UOSD Dermatologia, Policlinico Tor Vergata, Rome, Italy.

*Corresponding Author:*

Dr. Claudia Giofrè – claudiagiofre@tiscali.it

**Table S1 – List of Italian Ethics Committees**

| Site code | Investigator's first name | Investigator's surname | Site Department                | Site Institution                                              | Municipality | Province | Name of EC                                     |
|-----------|---------------------------|------------------------|--------------------------------|---------------------------------------------------------------|--------------|----------|------------------------------------------------|
| 01        | Paolo                     | Dapavo                 | SC Dermatologia                | AOU Città della Salute e della Scienza PO Molinette           | Turin        | Turin    | Comitato Etico Interaziendale                  |
| 02        | Paolo                     | Gisondi                | UO Dermatologica               | AOUI Integrata di Verona                                      | Verona       | Verona   | CESC delle Province di Verona e Rovigo         |
| 04        | Aurora                    | Parodi                 | Clinica Dermatologica          | Ospedale Policlinico San Martino                              | Genova       | Genova   | Comitato Etico Regione Liguria                 |
| 05        | Luca                      | Bianchi                | UOSD Dermatologia              | Policlinico Tor Vergata                                       | Rome         | Rome     | Comitato Etico Indipendente                    |
| 06        | Laura                     | Atzori                 | UOC Clinica Dermatologica      | Ospedale San Giovanni di Dio                                  | Cagliari     | Cagliari | Comitato Etico Indipendente                    |
| 07        | Gabriella                 | Fabbrocini             | UOC Dermatologia Clinica       | AOU Federico II                                               | Naples       | Naples   | Comitato Etico Università Federico II          |
| 08        | Concetta                  | Potenza                | Dermatologia Polo Pontina      | Ospedale A. Fiorini                                           | Terracina    | Latina   | Comitato Etico Indipendente                    |
| 09        | Rocco                     | De Pasquale            | Dermatologia                   | Presidio Ospedaliero San Marco                                | Catania      | Catania  | Comitato Etico Catania 1                       |
| 10        | Ketty                     | Peris                  | UOC Dermatologia               | Fondazione Policlinico Universitario A. Gemelli               | Rome         | Rome     | Comitato Etico                                 |
| 11        | Paolo                     | Amerio                 | Centro di Ricerca Clinica CAST | Università dell'Adriatico 'G. D'Annunzio' di Chieti e Pescara | Chieti       | Chieti   | Comitato Etico delle Province Chieti e Pescara |
| 12        | Rossana                   | Tiberio                | Dermatologia                   | AOU Maggiore della Carità                                     | Novara       | Novara   | Comitato Etico Interaziendale                  |
| 13        | Marina                    | Venturini              | UOC Dermatologia               | ASST Spedali Civili                                           | Brescia      | Brescia  | Comitato Etico di Brescia                      |
| 14        | Ada                       | Lo Schiavo             | UOC Clinica Dermatologica      | AOU Università della Campania Vanvitelli                      | Naples       | Naples   | Comitato Etico Università Vanvitelli           |
| 15        | Marco                     | Romanelli              | UO Dermatologia                | AOU Pisana Ospedale Santa Chiara                              | Pisa         | Pisa     | Comitato Etico Area Vasta Nord Ovest           |
| 16        | Antonio                   | Richetta               | Dermatologia e Venereologia    | AOU Policlinico Umberto I                                     | Rome         | Rome     | Comitato Etico                                 |

|    |                   |           |                                                   |                                         |           |           |                                                           |
|----|-------------------|-----------|---------------------------------------------------|-----------------------------------------|-----------|-----------|-----------------------------------------------------------|
| 18 | Francesco         | Cusano    | U.O.C.<br>Dermatologia                            | Azienda Ospedaliera G.<br>Rummo         | Benevento | Benevento | Comitato Etico<br>Campania Nord                           |
| 19 | Maria<br>Concetta | Fagnoli   | UOSD<br>Dermatologia<br>Generale ed<br>Oncologica | Ospedale San Salvatore                  | L'Aquila  | L'Aquila  | Comitato Etico per le<br>Province di L'Aquila e<br>Teramo |
| 20 | Annamaria         | Offidani  | SOD Clinica<br>Dermatologica                      | AOU Riuniti Umberto I<br>Lancisi Salesi | Ancona    | Ancona    | Comitato Etico<br>Regione Marche                          |
| 22 | Claudio           | Guarneri  | UOC<br>Dermatologia                               | AOU Policlinico G.<br>Martino           | Messina   | Messina   | Comitato Etico di<br>Messina                              |
| 23 | Francesca         | Prignano  | Dermatologia                                      | Ospedale Piero Palagi                   | Florence  | Florence  | Comitato Etico Area<br>Vasta Centro                       |
| 24 | Monica            | Corazza   | UOC<br>Dermatologia                               | Arcispedale Sant'Anna                   | Cona      | Ferrara   | Comitato Etico di<br>Area Vasta Emilia<br>Centro          |
| 25 | Maria Rita        | Bongiorno | UOC<br>Dermatologia e<br>MST                      | AOU Policlinico P.<br>Giaccone          | Palermo   | Palermo   | Comitato Etico<br>Palermo 1                               |
| 26 | Claudia           | Giofrè    | UOC<br>Dermatologia                               | Azienda Ospedaliera<br>Papardo          | Messina   | Messina   | Comitato Etico di<br>Messina                              |
| 27 | Francesco         | Loconsole | Dermatologica                                     | AOU Consorziale<br>Policlinico          | Bari      | Bari      | Comitato Etico<br>Indipendente                            |

EC, Ethics Commitee
